# Supplementary material for: Type 2 diabetes alters quiescent pancreatic stellate cells to tumor-prone state
Source: JCI journal article supplement (doi:10.1172/jci.insight.187424), 2025-06-22
Supplement: sd1 [file 1]

**Supplementary Table S1. Clinical characteristics of *db/db* mice**

|                            | Wild type  | <i>db/db</i>              |
|----------------------------|------------|---------------------------|
| Body weight (g)            | 24.7 ± 0.9 | 39.2 ± 2.6 <sup>***</sup> |
| HbA1c (%)                  | 3.0 ± 0.0  | 6.9 ± 0.6 <sup>***</sup>  |
| Fasting blood glucose (mM) | 3.4 ± 0.3  | 6.7 ± 1.8 <sup>***</sup>  |
| Fed blood glucose (mM)     | 7.8 ± 0.5  | 25.2 ± 2.9 <sup>***</sup> |
| Fasting insulin (ng/ml)    | 0.3 ± 0.1  | 2.1 ± 0.6 <sup>***</sup>  |
| Fed insulin (ng/ml)        | 1.5 ± 0.7  | 1.5 ± 0.3                 |

<sup>\*\*\*</sup>*P* < 0.001. HbA1c, glycated haemoglobin A1c.

**Supplementary Table S2. Clinicopathological characteristics of PDAC patients**

|                                       | non-T2D group (n=24) | T2D group (n=21) | <i>P</i> value |
|---------------------------------------|----------------------|------------------|----------------|
| Age (year)*                           | 70.5 (49-84)         | 71.0 (56-84)     | 0.699          |
| Gender, n (%)                         |                      |                  |                |
| Male                                  | 7 (29)               | 9 (43)           |                |
| Female                                | 17 (71)              | 12 (57)          | 0.080          |
| Smoker, n (%)                         | 8 (33)               | 12 (57)          | 0.140          |
| Body mass index (kg/m <sup>2</sup> )* | 22.7 (21.0-29.5)     | 22.3 (20.8-26.6) | 0.991          |
| HbA1c                                 | 6.0 (5.5-6.2)        | 7.6 (6.6-8.0)    | < 0.001        |
| Tumor size (mm)                       | 29.5 (25-45)         | 30 (25-40)       | 0.864          |
| T stage:                              |                      |                  |                |
| T1-T2                                 | 0 (0)                | 1 (5)            |                |
| T3-T4                                 | 24 (100)             | 20 (95)          | 0.467          |
| N stage:                              |                      |                  |                |
| N0                                    | 9 (38)               | 10 (48)          |                |
| N1                                    | 15 (62)              | 11 (52)          | 0.555          |
| Hisological grade:                    |                      |                  |                |
| well-mod                              | 19 (79)              | 17 (81)          |                |
| Por                                   | 5 (21)               | 4 (19)           | 1              |
| ly-factor                             |                      |                  |                |
| 0-1                                   | 12 (50)              | 11 (52)          |                |
| 2-3                                   | 12 (50)              | 10 (48)          | 1              |
| v-factor                              |                      |                  |                |
| 0-1                                   | 4 (17)               | 3 (14)           |                |
| 2-3                                   | 20 (83)              | 18 (86)          | 1              |
| ne-factor                             |                      |                  |                |
| 0-1                                   | 4 (17)               | 3 (14)           |                |
| 2-3                                   | 20 (83)              | 18 (86)          | 1              |
| Location                              |                      |                  |                |
| Ph                                    | 13 (54)              | 13 (62)          |                |
| Pb-t                                  | 10 (42)              | 6 (29)           |                |
| Phbt                                  | 1 (4)                | 2 (9)            | 0.569          |
| Type of resection, n (%)              |                      |                  |                |
| Pancreatico-duodenectomy              | 11 (46)              | 13 (62)          |                |
| Distal pancreatectomy                 | 10 (42)              | 6 (29)           |                |

|                                    |                     |                      |       |
|------------------------------------|---------------------|----------------------|-------|
| Total pancreatectomy               | 3 (12)              | 2 (9)                | 0.573 |
| Neo-adjuvant chemotherapy, n (%)   | 1 (4)               | 4 (19)               | 0.169 |
| Post-operative chemotherapy, n (%) | 16 (67)             | 14 (67)              | 1     |
| CA19-9 (U/mL)                      | 56.0 (21.5 - 291.8) | 102.0 (26.0 - 322.0) | 0.682 |

---

\*Median, PDAC, pancreatic ductal adenocarcinoma: T2D, type 2 diabetes mellitus: well-mod, well to moderately differentiated adenocarcinoma: Por, poorly differentiated adenocarcinoma: CA19-9, carbohydrate Antigen 19-9.

**Supplementary Table S3. Univariate analysis of relapse-free and overall survival in PDAC subjects**

| Factor                               | RFS               |                | OS               |                |
|--------------------------------------|-------------------|----------------|------------------|----------------|
|                                      | Median RFS (date) | <i>P</i> value | Median OS (date) | <i>P</i> value |
| Age (yrs): < 65 vs ≥ 65              | 1178 vs 441       | 0.231          | NA vs 933        | 0.155          |
| Male vs Female                       | 446 vs 535        | 0.702          | 632 vs 1097      | 0.413          |
| Tumor size (mm): < 30 vs ≥ 30        | 602 vs 281        | 0.24           | 1097 vs 597      | 0.052          |
| N: (-) vs (+)                        | 750 vs 407        | 0.0764         | 1266 vs 979      | 0.284          |
| HbA1c (%): < 6.5 vs ≥ 6.5            | 638 vs 446        | 0.229          | 933 vs NA        | 0.180          |
| T2D: (-) vs (+)                      | 441 vs 638        | 0.046          | 632 vs NA        | < 0.01         |
| CA19-9 (U/mL): < 37 vs ≥ 37          | 946 vs 407        | 0.163          | 1266 vs 933      | 0.341          |
| PSCa-L/CXCL13 <sup>+</sup> vs others | 1212 vs 441       | < 0.01         | NA vs 847        | < 0.01         |

PDAC, pancreatic ductal adenocarcinoma: RFS, relapse-free survival: OS, overall survival: NA, not applied:  
HbA1c, glycated haemoglobin A1c: T2D, type 2 diabetes mellitus: CA19-9, carbohydrate antigen 19-9: PSCa,  
pancreatic stellate cell activation score: PSCa-L, PSCa-low.

**Supplementary Table S4. Multivariate analysis of overall and recurrence-free survival in PDAC subjects**

| Factor                               | RFS        |             |                | OS         |             |                |
|--------------------------------------|------------|-------------|----------------|------------|-------------|----------------|
|                                      | Risk ratio | 95%CI       | <i>P</i> value | Risk ratio | 95%CI       | <i>P</i> value |
| T2D: (-) vs (+)                      | 1.476      | 0.66 - 3.29 | 0.341          | 2.443      | 0.81 – 7.33 | 0.111          |
| PSCa-L/CXCL13 <sup>+</sup> vs others | 0.352      | 0.13 - 0.93 | 0.034          | 0.269      | 0.07 – 1.03 | 0.056          |

RFS, recurrence-free survival: OS, overall survival: CI, confidence interval: T2D, type 2 diabetes mellitus:

PSCa, pancreatic stellate cell activation score: PSCa-L, PSCa-low.

**Supplementary Table S5. List of antibodies used in this study**

| <b>Antibody name</b> | <b>Species</b> | <b>Catalog No.</b> | <b>Vendor</b>                              | <b>Experiments</b> | <b>Dilutions</b> |
|----------------------|----------------|--------------------|--------------------------------------------|--------------------|------------------|
| M6a                  | Mouse          | D055-3             | MBL Life Science (Tokyo, Japan)            | ICC                | 1:200            |
| PTN                  | Rabbit         | 27117-1-AP         | Proteintech (IL, USA)                      | ICC                | 1:200            |
| PDGFR $\alpha$       | Rabbit         | EPR22059-270       | Abcam (Cambridge, UK)                      | ICC                | 1:200            |
| Sca1                 | Rat            | E13 161-7          | Abcam (Cambridge, UK)                      | IHC, ICC           | 1:1000           |
| CXCL13               | Goat           | AF472              | R&D systems (MN, USA)                      | IHC, ICC, IF       | 1:100            |
| Ly-6c                | Rat            | HK1.4              | BioLegend (CA, USA)                        | IHC, ICC           | 1:100            |
| $\alpha$ SMA         | Rabbit         | EPR5368            | Abcam (Cambridge, UK)                      | IHC, ICC, IF       | 1:200            |
| FABP4                | Rabbit         | EPR3579            | Abcam (Cambridge, UK)                      | IHC, ICC, IF       | 1:200            |
| CD31                 | Rabbit         | D8V9E              | Cell Signaling Technology, Inc., (MA, USA) | IHC                | 1:100            |
| Ki67                 | Rabbit         | ab66155            | Abcam (Cambridge, UK)                      | IHC                | 1:200            |
| CD3                  | Mouse          | F7.2.38            | Agilent (CA, USA)                          | IHC                | 1:200            |
| CD8                  | Mouse          | C8/144B            | Agilent (CA, USA)                          | IHC                | 1:200            |
| B220                 | Rat            | RA3-6B2 (RUO)      | BD Bioscience (NJ, USA)                    | IHC                | 1:200            |
| CD45                 | Rabbit         | 20103-1-AP         | Proteintech (IL, USA)                      | IHC                | 1:200            |
| CD20                 | Mouse          | L26                | Leica (Wetzlar, Germany)                   | IHC                | 1:200            |
| CXCL13               | Goat           | AF801              | R&D systems (MN, USA)                      | IHC                | 1:100            |
| F4/80-PE/cy7         | Rat            | BM8                | BioLegend (CA, USA)                        | FACS               | 1:100            |
| CD326 (Ep-CAM)-FITC  | Rat            | G8.8               | BioLegend (CA, USA)                        | FACS               | 1:100            |
| Ly6c-FITC            | Rat            | HK1.4              | BioLegend (CA, USA)                        | FACS               | 1:50             |
| Sca1-PE              | Rat            | D7                 | BioLegend (CA, USA)                        | FACS               | 1:200            |

|                                           |        |         |                                    |      |       |
|-------------------------------------------|--------|---------|------------------------------------|------|-------|
| Sca1-APC                                  | Rat    | D7      | BioLegend (CA, USA)                | FACS | 1:200 |
| Sca1-PE                                   | Rat    | D7      | Thermo Fisher Scientific (MA, USA) | FACS | 1:100 |
| CXCL13-APC                                | Rat    | DS8CX13 | Thermo Fisher Scientific (MA, USA) | FACS | 1:50  |
| FITC-isotype                              | Rat    | RTK2758 | Biolegend (CA, USA)                | FACS | 1:100 |
| APC-isotype                               | Rat    | eBR2a   | Biolegend (CA, USA)                | FACS | 1:100 |
| PE-isotype                                | Rat    | eBR2a   | Biolegend (CA, USA)                | FACS | 1:100 |
| PE/Cy7-isotype                            | Rat    | RTK2758 | Biolegend (CA, USA)                | FACS | 1:100 |
| Alexa fluore 488 anti-<br>mouse IgG (H+L) | Donkey | A21202  | Thermo Fisher Scientific (MA, USA) | IF   | 1:500 |
| Alexa fluore 594 anti-<br>mouse IgG (H+L) | Donkey | A21203  | Thermo Fisher Scientific (MA, USA) | IF   | 1:500 |
| Alexa fluor 488 anti-rabbit<br>IgG (H+L)  | Donkey | A32790  | Thermo Fisher Scientific (MA, USA) | IF   | 1:500 |
| Alexa fluor 594 anti-rabbit<br>IgG (H+L)  | Donkey | A21207  | Thermo Fisher Scientific (MA, USA) | IF   | 1:500 |
| Alexa fluor 488 anti-gout<br>IgG (H+L)    | Donkey | A11055  | Thermo Fisher Scientific (MA, USA) | IF   | 1:500 |

---

ICC, immunocytochemistry; IHC, immunohistochemistry; FACS, fluorescence assisted cell sorting; IF, immunofluorescence.

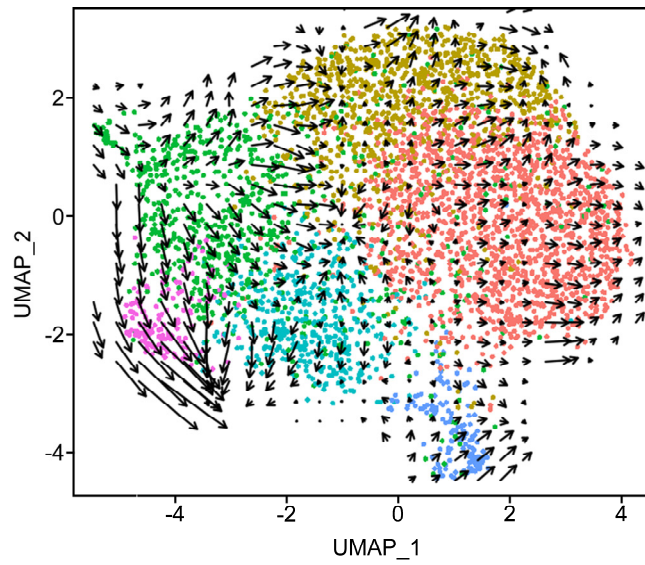

**Supplementary Figure S1. RNA velocity analysis of Pancreatic fibroblasts.**

Arrow direction and length indicate probable lineage trajectory and velocity, respectively.

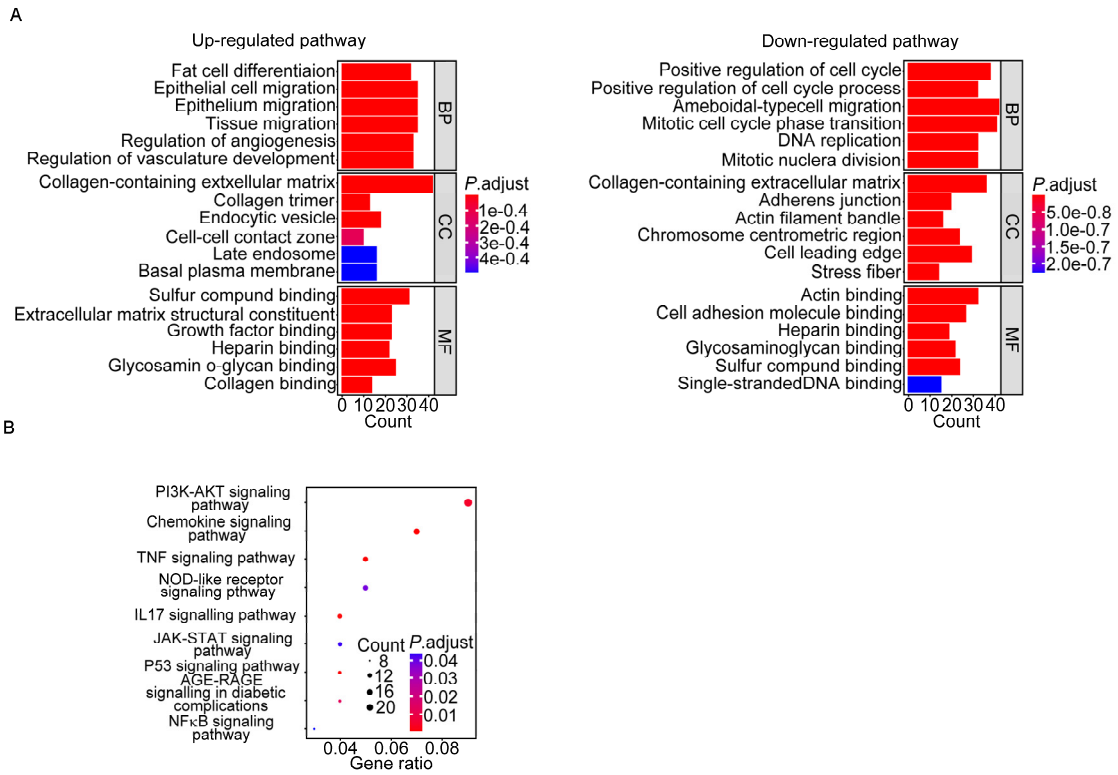

**Supplementary Figure S2. Gene Ontology analysis and enriched analysis of tapPafs.**

**(A)** Gene Ontology analysis of tapPafs revealed upregulated and downregulated processes. **(B)** Bar plots showing KEGG pathways enriched in tapPafs. Pafs, pancreatic fibroblasts; tapPafs, tumor immunity- and angiogenesis-promoting Pafs; KEGG, Kyoto Encyclopedia of Genes and Genomes; BP, biological process; CC, cellular component; MF, molecular function.

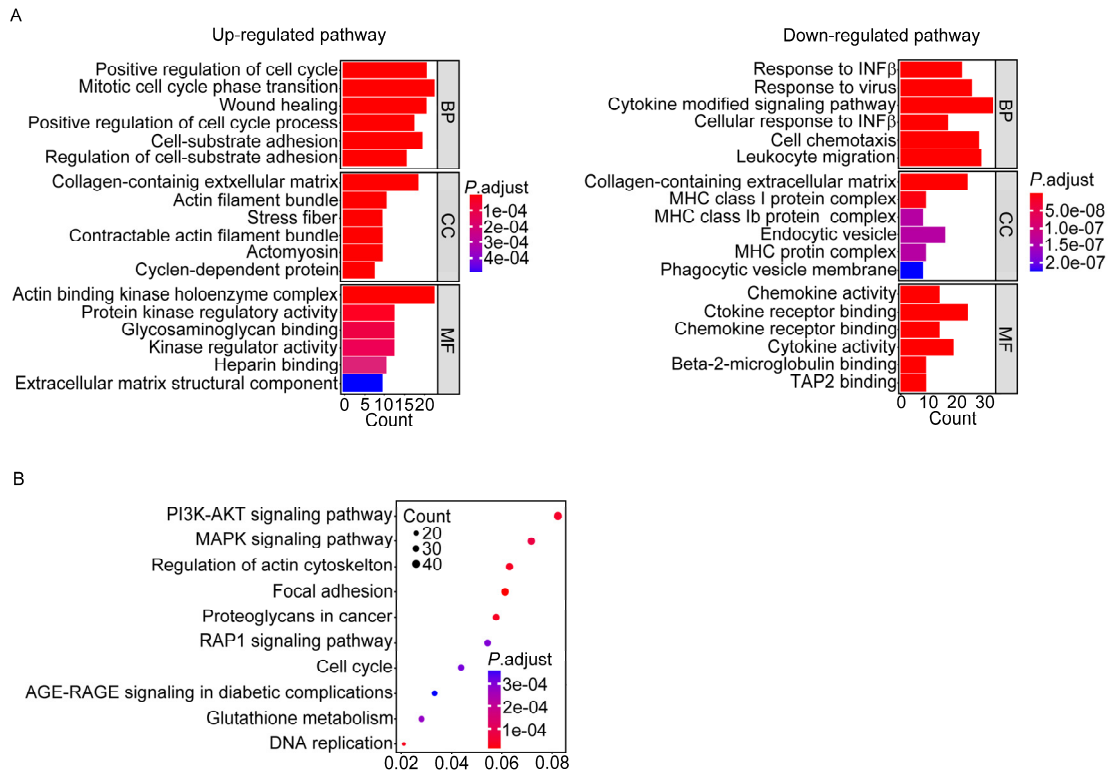

**Supplementary Figure S3. Gene Ontology analysis and enriched analysis of myPafs.**

**(A)** Gene Ontology analysis of myPafs revealed strong enrichment of upregulated pathways and downregulated pathways. **(B)** Bar plots showing KEGG pathways enriched in myPafs. myPafs, myofibroblastic Pafs; tapPafs, tumor immunity- and angiogenesis-promoting Pafs; KEGG, Kyoto Encyclopedia of Genes and Genomes; BP, biological process; CC, cellular component; MF, molecular function.

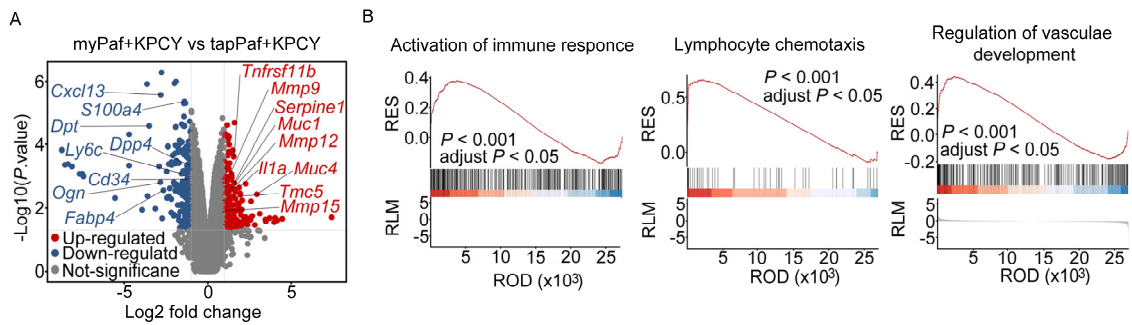

**Supplementary Figure S4. Volcano plots and gene set enrichment analysis of tapPafs.**

**(A)** Volcano plots illustrating the log<sub>2</sub>-fold changes and corresponding *P* values for differentially expressed genes in the tumor expression dataset between KPCY tumor cells cotransplanted with myPafs and those cotransplanted with tapPafs; *P* < 0.01 was considered to indicate statistical significance. **(B)** GSEA was performed on tumors transplanted with tapPafs or myPafs. Pafs, pancreatic fibroblasts; tapPafs, tumor immunity- and angiogenesis-promoting Pafs; myPafs, myofibroblastic Pafs; GSEA, gene set enrichment analysis.

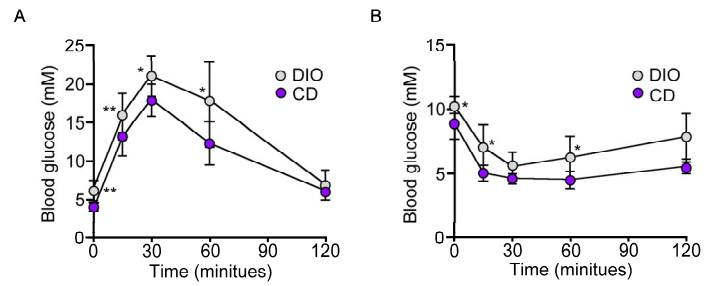

**Supplementary Figure S5. OGTT and ITT of KPCY cell-transplanted mice.**

(A) OGTTs were performed on KPCY cell-transplanted mice after 8 weeks of high-fat diet feeding (n=7 per each group). (B) The ITT was performed at the same time as the OGTT (n=7 per each group). OGTT, oral glucose tolerance test; ITT, insulin tolerance test; DIO, diet-induced obesity; CD, control diet. The data are presented as the mean  $\pm$  SD. Statistical analysis was performed by 2-way ANOVA with post hoc multiple-comparison tests. \* $P < 0.05$ , \*\* $P < 0.01$ .

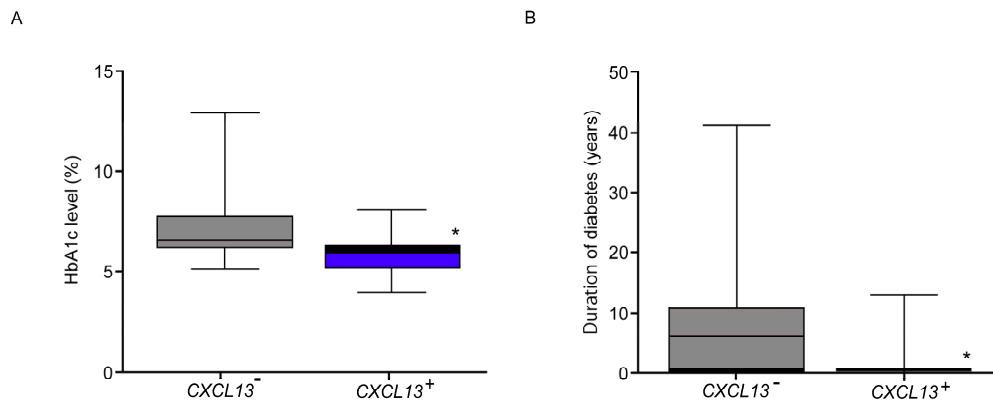

**Supplementary Figure S6. Correlation between presence of CXCL13<sup>+</sup> stromal cells and diabetic factors.**

(A) HbA1c level in subjects with the presence of CXCL13<sup>+</sup> stromal cells was significantly higher than that in subjects with absence of CXCL13<sup>+</sup> stromal cells. (B) Duration of diabetes in subjects with the presence of CXCL13<sup>+</sup> stromal cells was significantly longer than in subjects with absence of CXCL13<sup>+</sup> stromal cells. Box and whiskers are median and 25% interquartile intervals. Bar means standard deviation. The data are presented as the mean  $\pm$  SD. Statistical analysis was performed by Fisher's exact test and Mann – Whitney U test. \* $P < 0.05$ .

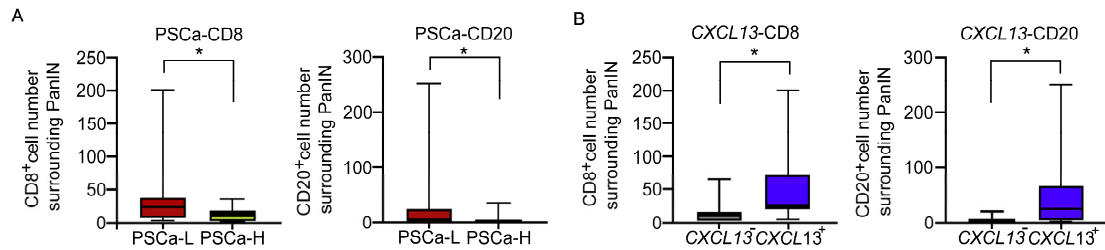

**Supplementary Figure S7. CD8- and CD20-positive cells infiltration surrounding PanIN lesions of human PDAC patients.**

**(A)** The density of CD8- and CD20-positive cells surrounding PanIN lesions quantitatively evaluated in immunostained sections according to the differences in the PSCa score (n=19; PSCa-H and n=26; PSCa-L) and **(B)** number of *CXCL13*-positive stromal cells (n=31; *CXCL13*<sup>-</sup> and n=14). PDAC, pancreatic ductal adenocarcinoma; PanIN, pancreatic intraepithelial neoplasia; PSCs; pancreatic stellate cells; PSCa, pancreatic stellate cell activation; PSCa-L, PSCa-low; PSCa-H, PSCa-high. Box and whiskers are median and 25% interquartile intervals. The data are presented as the means ± SD. Statistical analysis was performed by Fisher's exact test and Mann – Whitney U test. For multiple comparisons, the Z test with Bonferroni adjustment was used. Bar represents mean±SD. \**P* < 0.05.

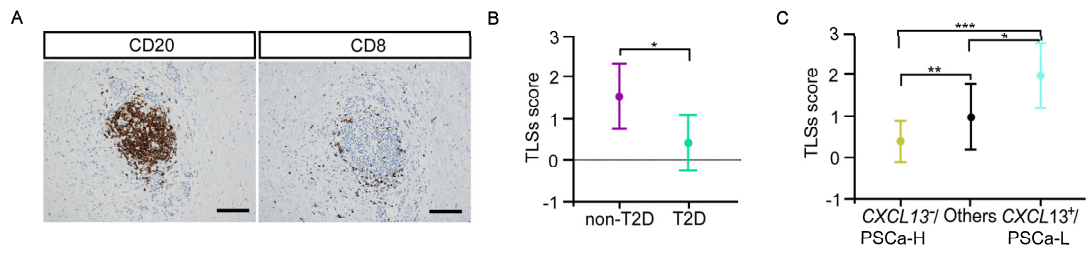

**Supplementary Figure S8. Tertiary lymphoid structures in human PDAC samples with T2D.**

**(A)** Density of TLSs quantitatively evaluated between non-T2D and T2D samples. **(B)** Density of TLSs quantitatively evaluated based on the number of *CXCL13*-positive stromal cells and the PSCa score. PDAC, pancreatic ductal adenocarcinoma; TLSs, tertiary lymphoid structures; T2D, type 2 diabetes; PSCs, pancreatic stellate cells; PSCa, pancreatic stellate cell activation; PSCa-L, PSCa-low; PSCa-H, PSCa-high. Statistical analysis was performed by Fisher's exact test and Mann – Whitney U test. Bar represents mean  $\pm$  SD. \* $P < 0.05$ , \*\* $P < 0.01$ , \*\*\* $P < 0.001$ . The scale bar represents 100  $\mu$ m.
